# Supplementary material for: Propyl-5-hydroxy-3-methyl-1-phenyl-1H-pyrazole-4-carbodithioate (HMPC): a new bacteriostatic agent against methicillin—resistant Staphylococcus aureus
Source: PubMed Central journal article supplement (PMC5935714; doi:10.1038/s41598-018-25571-w), 2018-05-04
Supplement: 41598_2018_25571_MOESM1_ESM.pdf [file 41598_2018_25571_MOESM1_ESM.pdf]

1 **Propyl-5-hydroxy-3-methyl-1-phenyl-1*H*-pyrazole-4-carbodithioate (HMPC): a new**  
2 **bacteriostatic agent against methicillin—resistant *Staphylococcus aureus***

3

4 **Tatiana Johnston<sup>1</sup>, Daria Van Tyne<sup>2,3</sup>, Roy F. Chen<sup>1</sup>, Nicolas L. Fawzi<sup>4</sup>, Bumsup**  
5 **Kwon<sup>5</sup>, Michael J. Kelso<sup>6</sup>, Michael S. Gilmore<sup>2,3</sup> & Eleftherios Mylonakis \*,<sup>1</sup>**

6

7 <sup>1</sup>Department of Infectious Disease, Rhode Island Hospital, Alpert Medical School of  
8 Brown University, Providence, Rhode Island, USA, <sup>2</sup>Department of Ophthalmology,  
9 Harvard Medical School, Massachusetts Eye and Ear Infirmary, Boston, Massachusetts,  
10 USA, <sup>3</sup>Department of Microbiology and Immunobiology, Harvard Medical School,  
11 Boston, Massachusetts, USA, <sup>4</sup>Department of Molecular Pharmacology, Physiology, and  
12 Biotechnology, Brown University, Providence, Rhode Island, USA, <sup>5</sup>Department of  
13 Neurology, Rhode Island Hospital, Warren Alpert Medical School of Brown University,  
14 Providence, RI 02903, USA, <sup>6</sup>School of Chemistry and Illawarra Health and Medical  
15 Research Institute, University of Wollongong, NSW 2522, Australia. Correspondence  
16 and requests for materials should be addressed to E.M. (email: emylonakis@lifespan.org)

17

18

19

20

21 **Supplemental Methods**

22 **Ames test.** To assess the potential mutagenic potency of HMPC the Ames test was  
23 performed according to the provided by manufacture protocol (Fisher Scientific, NH,  
24 USA, NC9159443). The range of concentrations of HMPC from 4 µg to 64 µg was tested  
25 and colony counts compared to a negative control (DMSO) and the positive control 4-  
26 NOPD (4-nitro-o-phenylenediamine; carcinogen).

27 ***Galleria mellonella* toxicity studies.** *Galleria mellonella* larvae were purchased from  
28 Vanderhost Wholesale (OH, USA) and stored in the dark at room temperature upon  
29 arrival until used. The *G. mellonella* manipulation techniques were performed according  
30 previously published protocol<sup>1</sup>. In brief, larvae weighing 230-250 mg were selected for  
31 experiments. Each group included 10 larvae and experiments were repeated twice using  
32 larvae from independent batches. There were two negative control groups in each  
33 experiment, the first group underwent no manipulation and the second was injected with  
34 PBS only for control of the impact of physical trauma on larvae. Larvae were injected in  
35 the last left proleg using 10 µl Hamilton syringe (20779, Sigma Aldrich, MO, USA) with  
36 HMPC at concentrations of 4, 8 and 10 mg/kg. Later the larvae in Petri dishes were  
37 placed into 37 °C incubator and their survival was monitored each 24h for 5 consecutive  
38 days. Larvae were scored for survival by observing for movement after gentle touch.

39

40 **Supplemental Tables**

41 **Table S1.** Ames test to assess the potential mutagenicity of HMPC.

| Name of chemical | Average number of colonies <sup>a</sup> | +/- STDEV |
|------------------|-----------------------------------------|-----------|
| 4-NOPD           | 174                                     | 6         |
| DMSO alone       | 55                                      | 4         |
| 4 µg HMPC        | 41                                      | 4         |
| 8 µg HMPC        | 62                                      | 8         |
| 16 µg HMPC       | 49                                      | 2         |
| 32 µg HMPC       | 42                                      | 2         |
| 64 µg HMPC       | 39                                      | 3         |

42 <sup>a</sup>The test was performed in triplicate and the numbers of colonies were rounded to the  
43 next whole number.

44

45 Supplemental Figures

46 Figure S1

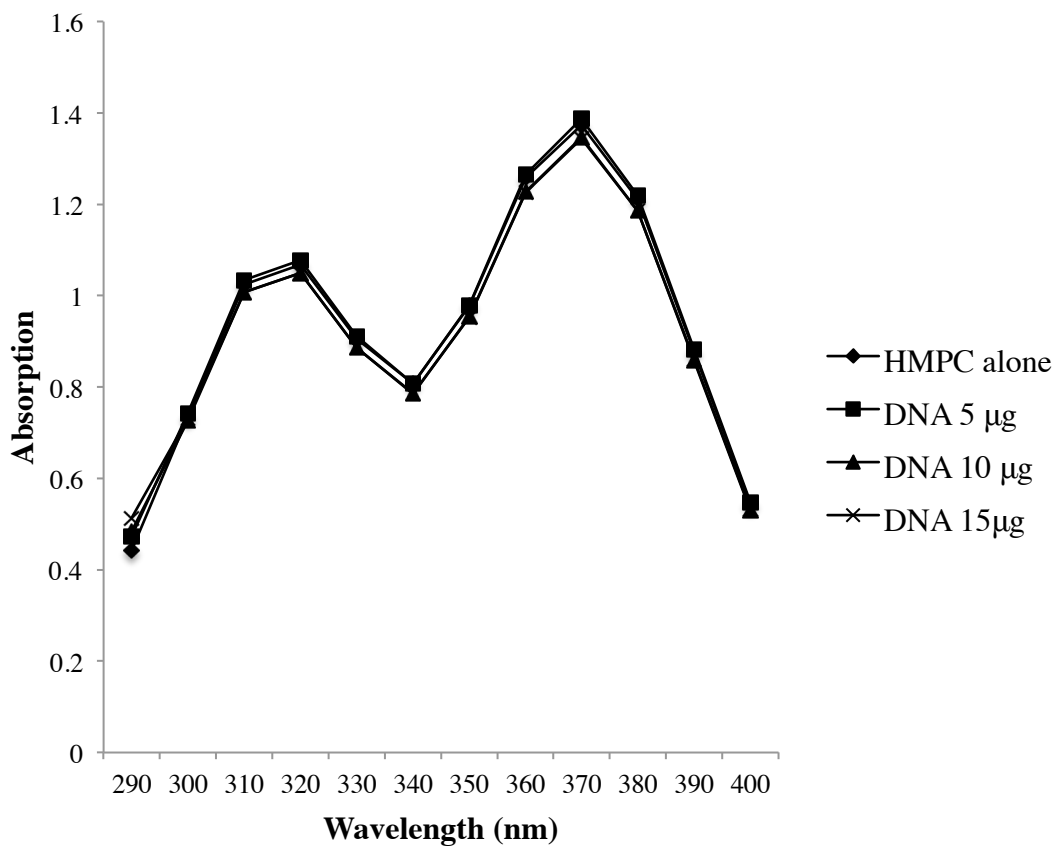

47

48 **Figure S1.** UV-visible absorption spectra of HMPC alone and in the presence of increasing  
49 concentration of DNA in Tris-HCl buffer (pH7.2). No significant hyperchromism or  
50 hyperchromism was observed with increasing concentration of DNA confirming no interaction of  
51 HMPC and DNA.

52 **Figure S2**

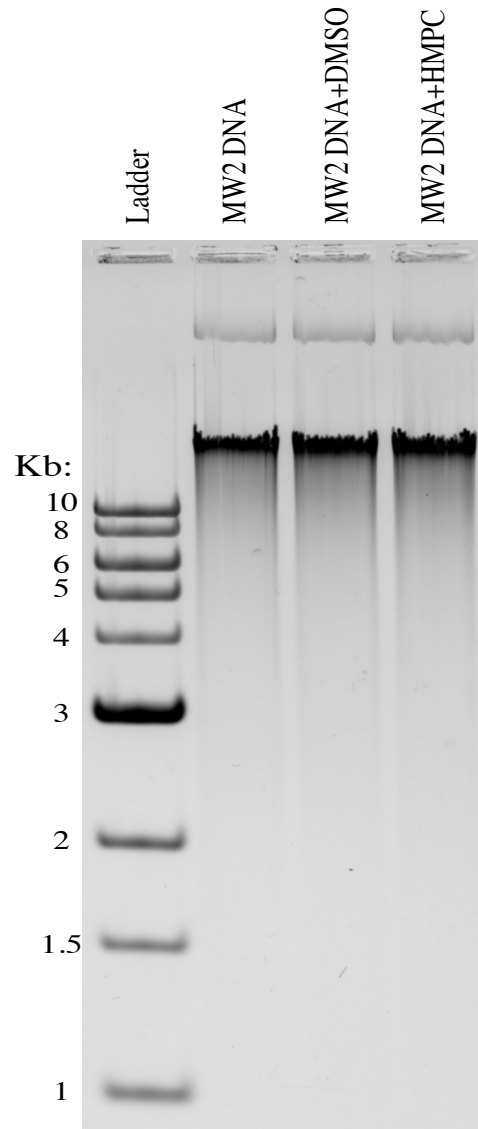

53

54 **Figure S2.** Electrophoretic mobility shift assay (EMSA) to detect binding between HMPC and *S.*  
55 *aureus* MW2 genomic DNA. DNA (500ng) was incubated with DMSO alone, or with 5 $\mu$ g  
56 HMPC dissolved in DMSO before being run on a 1% agarose gel at 70 volts for 4 hours. The gel  
57 was then stained by incubating in 0.5 $\mu$ g/ml ethidium bromide. The contrast was not adjusted and  
58 the image was not processed or manipulated other than to crop the blank areas of the gel.

59 **Figure S3**

60 **(A)**

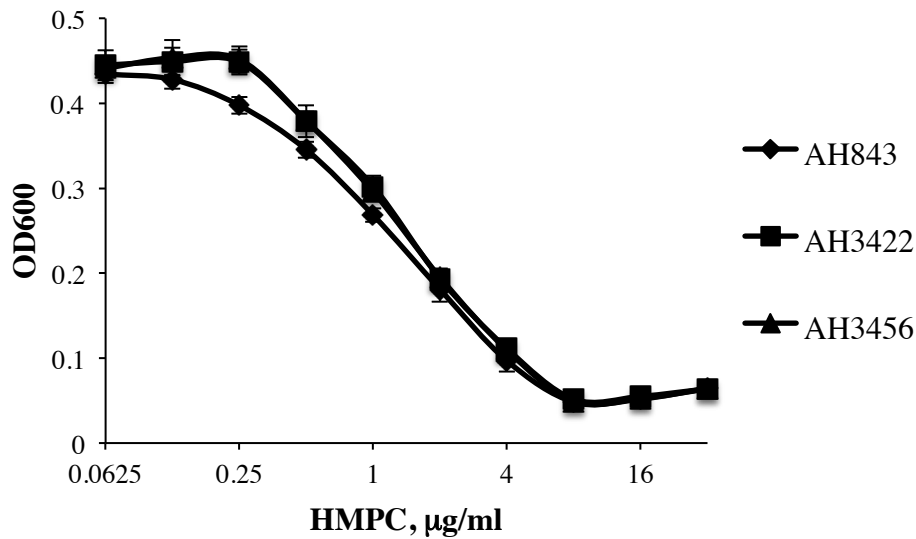

61

62 **(B)**

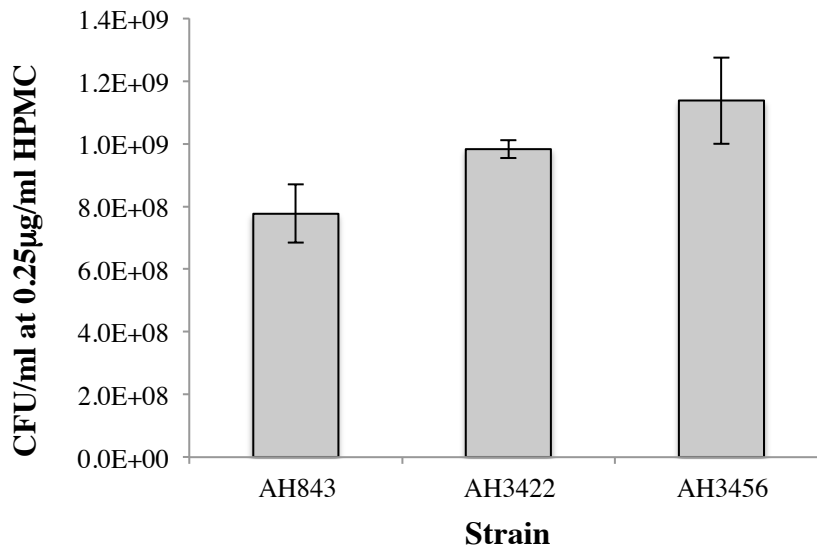

63

64 **Figure S3.** Mutants that lack a functional *mgrA* are more tolerant of sub-MIC levels of

65 HPMC. **(A)** Dose-response curves for the AH843 wild-type strain and two mutant strains

66 that have a disrupted *mgrA* locus (AH3422 and AH3456). All strains were inoculated at

67 the same cell density into MH broth containing varying concentrations of HPMC, and

68 OD<sub>600</sub> was measured after 24 hours of growth at 37 °C. **(B)** Cell viability after growth in

69 0.25 µg/ml HMPC. Bacterial strains grown in the presence of 0.25 µg/ml HMPC for 24  
70 hours were serially diluted and plated onto TSA plates with no drug and were grown  
71 overnight at 37 °C in order to enumerate CFU/ml. In both panels, mean +/- standard  
72 deviation of at least three replicates is shown. p-values for comparison of *mgrA* mutants  
73 to AH843 wild type strains in panel B using a two-tailed t-test are p=0.02 for AH3422  
74 and p=0.01 for AH3456.

75

76 **Figure S4.**

77

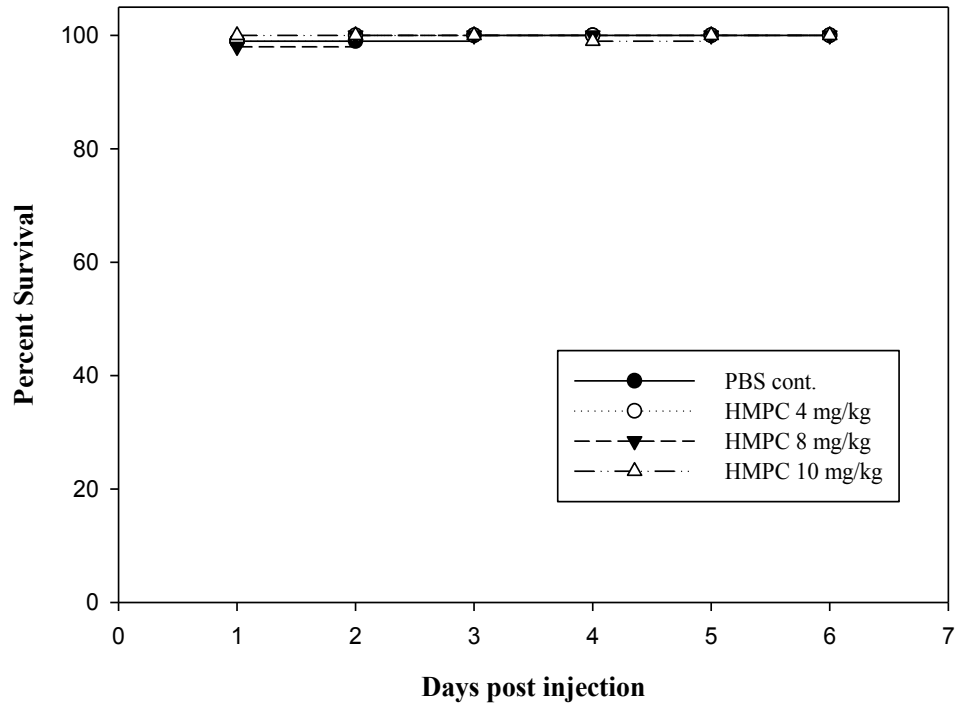

78

79

80 **Figure S4.** *Galleria mellonella* toxicity experiment. Graph represents combined data

81 from two independent experiments (each group had n=10 larvae, no larvae death

82 observed in no injection control group). There was no difference in larvae survival

83 between the groups (one way ANOVA4, P=0.000).



84 **References**

- 85 1 Desbois, A. P. & Coote, P. J. Wax moth larva (*Galleria mellonella*): an in vivo  
86 model for assessing the efficacy of antistaphylococcal agents. *J. Antimicrob.*  
87 *Chemother.* **66**, 1785-1790, doi:10.1093/jac/dkr198 (2011).  
88
